# Supplementary material for: The Microbial Mechanisms of a Novel Photosensitive Material (Treated Rape Pollen) in Anti-Biofilm Process under Marine Environment
Source: MDPI journal article supplement (doi:10.3390/ijms23073837), 2022-03-30
Supplement: s1 [file s1]

## Supporting Information

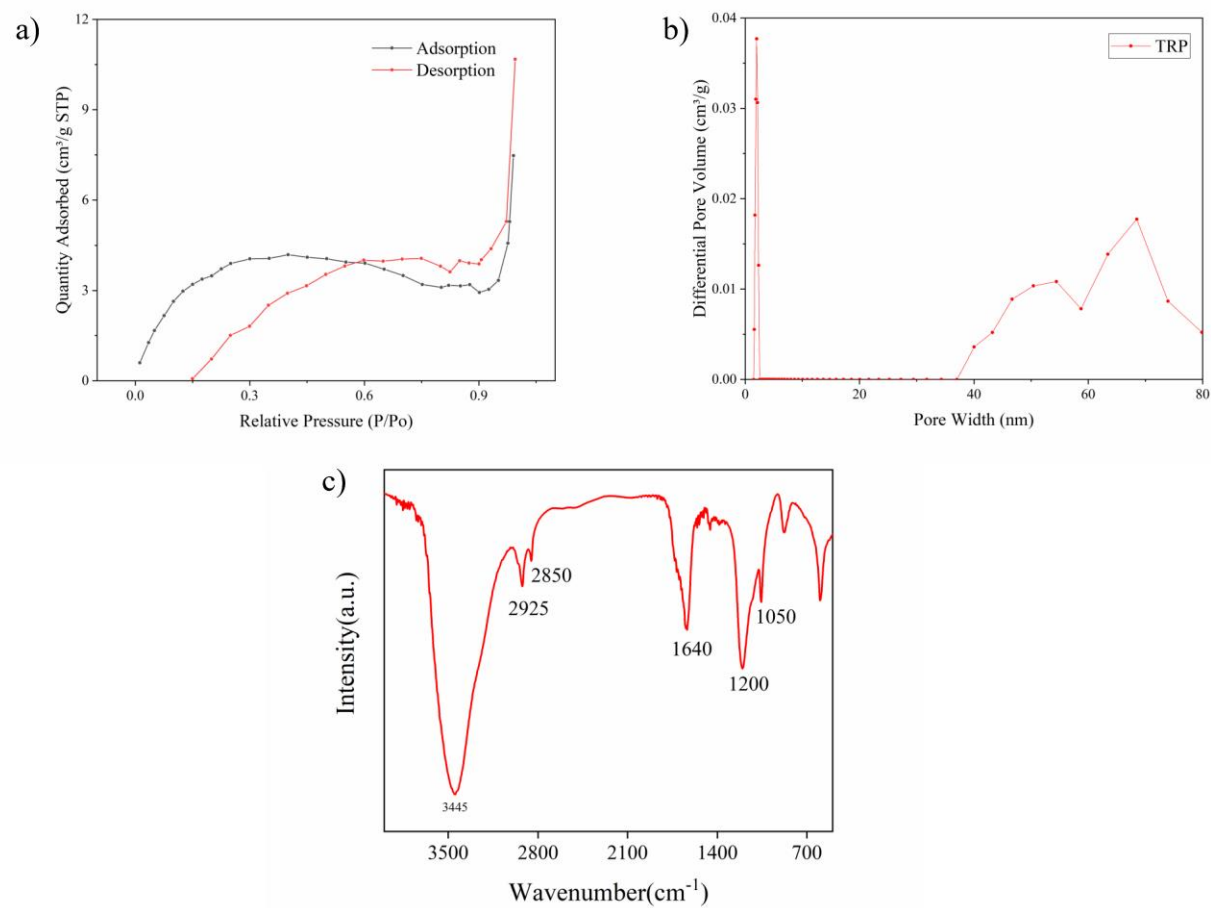

**Figure S1.** a) BET specific surface area, b) The Differential pore volume distribution and c) FTIR spectra of TRP.

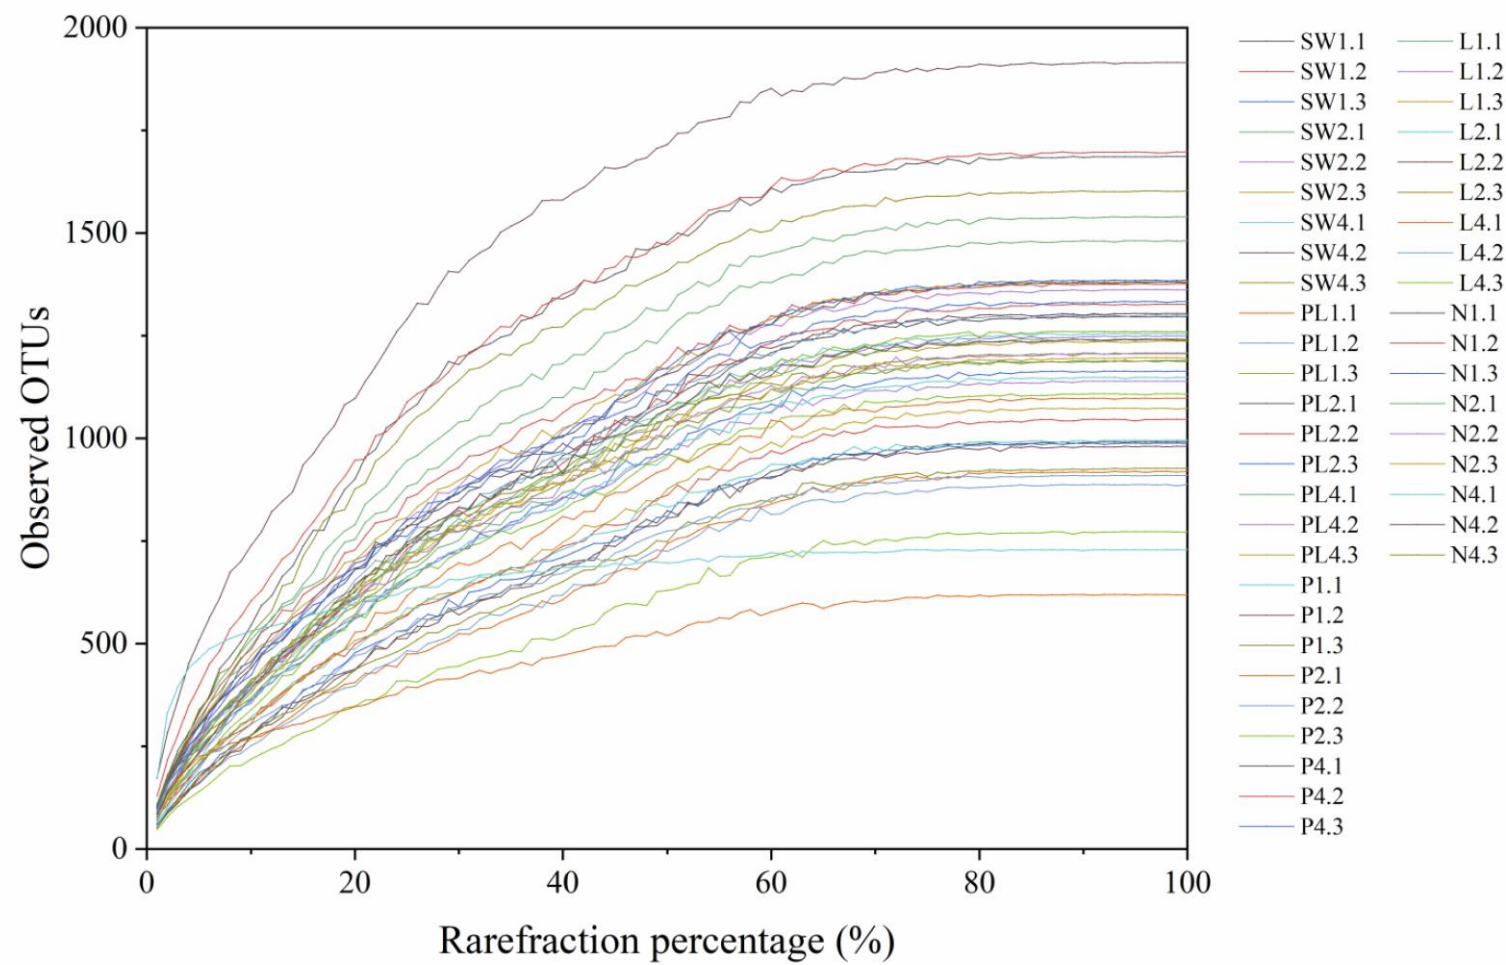

**Figure S2.** Rarefaction curves of observed OTUs and 16S rRNA gene sequence numbers.

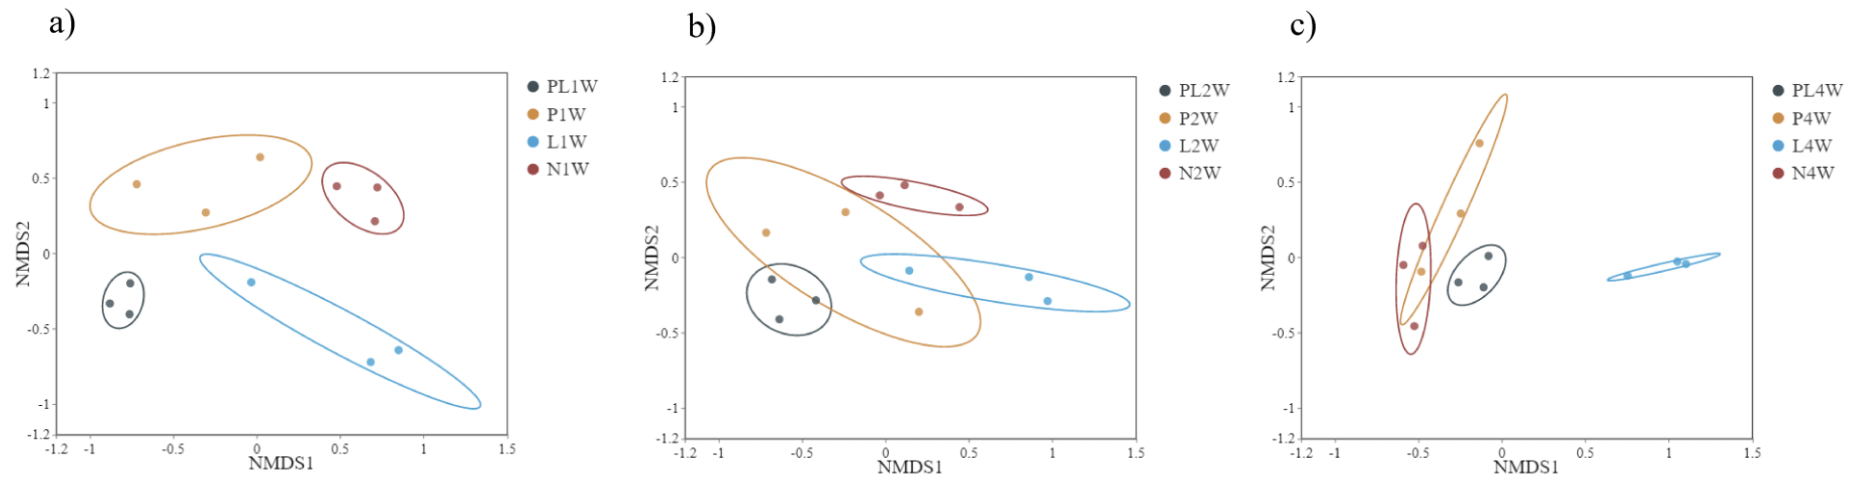

**Figure S3.** a) The Nonmetric Multidimensional Scaling (NMDS) among the various samples during different time points. a) 1 week, b) 2 weeks and c) 4 weeks.

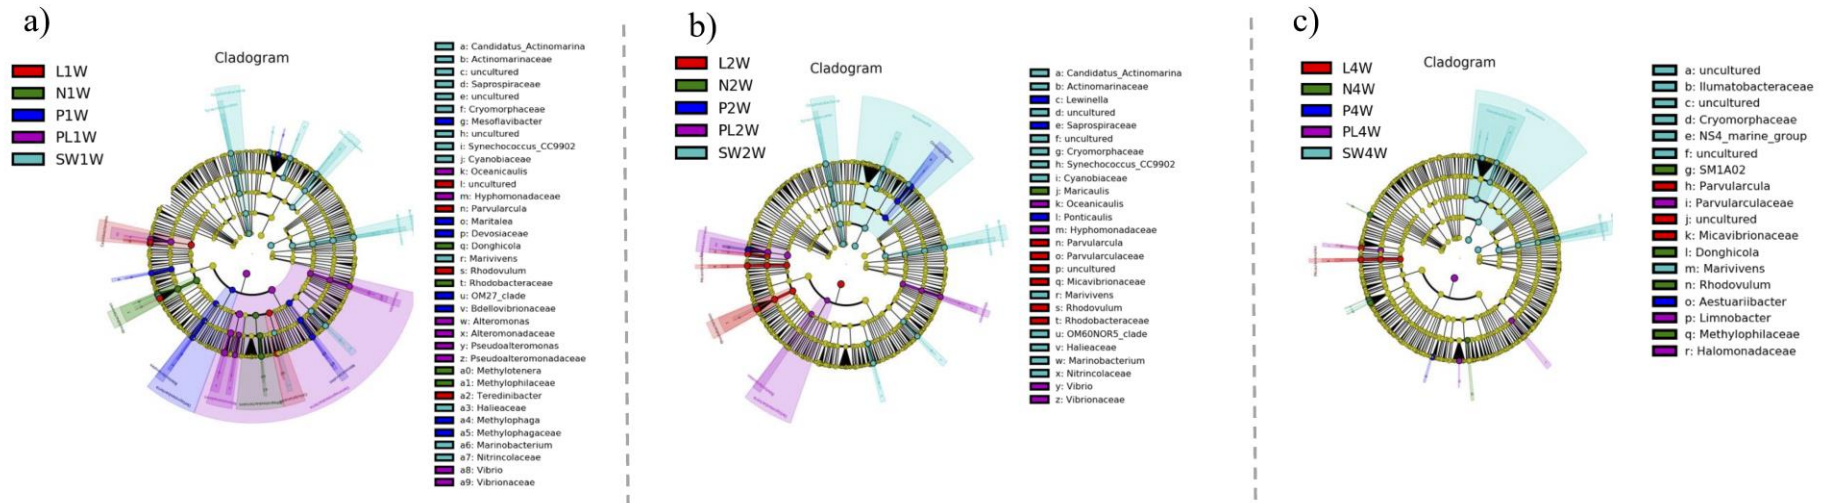

**Figure S4.** The Linear Discriminant Analysis Effect Size (LEfSe,  $LDA > 4$ , from phylum to genus) of microbial communities structure on a) 1 week, b) 2 weeks and c) 4 weeks.

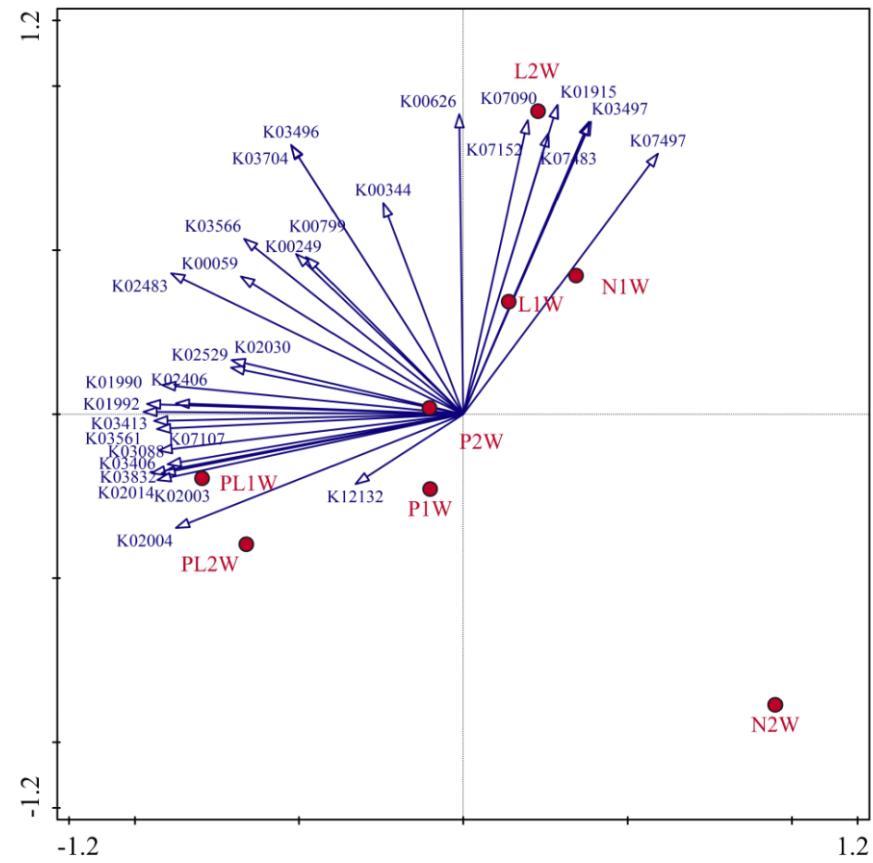

**Figure S5.** Redundancy Analysis (RDA) on the correlation between different biofilms and genes.

**Table S1.** Information of the 16S rRNA gene (V4-V5 region) amplicon sequences. Paired-end reads (read length 250 bp) sequenced using Illumina HiSeq 2500 platform were merged together for further analyses.

| No. for analysis | Seawater/Biofilm 16S amplicons | Total sequences | No. of OTUs | Filter/ Biofilm substrata | Sampling time/ Durations for biofilm formation |
|------------------|--------------------------------|-----------------|-------------|---------------------------|------------------------------------------------|
| SW1.1            | Seawater                       | 65618           | 1296        | 0.22 $\mu$ m              | 1 <sup>st</sup> week                           |
| SW1.2            | Seawater                       | 61807           | 1326        | 0.22 $\mu$ m              | 1 <sup>st</sup> week                           |
| SW1.3            | Seawater                       | 63621           | 1163        | 0.22 $\mu$ m              | 1 <sup>st</sup> week                           |
| SW2.1            | Seawater                       | 57751           | 1188        | 0.22 $\mu$ m              | 2 <sup>se</sup> weeks                          |
| SW2.2            | Seawater                       | 64621           | 1249        | 0.22 $\mu$ m              | 2 <sup>se</sup> weeks                          |
| SW2.3            | Seawater                       | 66208           | 1236        | 0.22 $\mu$ m              | 2 <sup>se</sup> weeks                          |
| SW4.1            | Seawater                       | 72154           | 1255        | 0.22 $\mu$ m              | 4 <sup>th</sup> weeks                          |
| SW4.2            | Seawater                       | 59369           | 1915        | 0.22 $\mu$ m              | 4 <sup>th</sup> weeks                          |
| SW4.3            | Seawater                       | 70550           | 1189        | 0.22 $\mu$ m              | 4 <sup>th</sup> weeks                          |
| PL1.1            | TRP with light                 | 71459           | 920         | 904L steel alloy          | 1 <sup>st</sup> week                           |
| PL1.2            | TRP with light                 | 74243           | 888         | 904L steel alloy          | 1 <sup>st</sup> week                           |
| PL1.3            | TRP with light                 | 61161           | 773         | 904L steel alloy          | 1 <sup>st</sup> week                           |
| PL2.1            | TRP with light                 | 70201           | 991         | 904L steel alloy          | 2 <sup>se</sup> weeks                          |
| PL2.2            | TRP with light                 | 69206           | 1046        | 904L steel alloy          | 2 <sup>se</sup> weeks                          |
| PL2.3            | TRP with light                 | 57817           | 988         | 904L steel alloy          | 2 <sup>se</sup> weeks                          |
| PL4.1            | TRP with light                 | 60189           | 1539        | 904L steel alloy          | 4 <sup>th</sup> weeks                          |
| PL4.2            | TRP with light                 | 60218           | 1362        | 904L steel alloy          | 4 <sup>th</sup> weeks                          |
| PL4.3            | TRP with light                 | 58073           | 1381        | 904L steel alloy          | 4 <sup>th</sup> weeks                          |
| P1.1             | TRP only                       | 73422           | 995         | 904L steel alloy          | 1 <sup>st</sup> week                           |
| P1.2             | TRP only                       | 68436           | 1304        | 904L steel alloy          | 1 <sup>st</sup> week                           |

|      |                     |       |      |                  |                       |
|------|---------------------|-------|------|------------------|-----------------------|
| P1.3 | TRP only            | 62604 | 1206 | 904L steel alloy | 1 <sup>st</sup> week  |
| P2.1 | TRP only            | 71089 | 1097 | 904L steel alloy | 2 <sup>se</sup> weeks |
| P2.2 | TRP only            | 63643 | 1300 | 904L steel alloy | 2 <sup>se</sup> weeks |
| P2.3 | TRP only            | 56856 | 1260 | 904L steel alloy | 2 <sup>se</sup> weeks |
| P4.1 | TRP only            | 67934 | 1686 | 904L steel alloy | 4 <sup>th</sup> weeks |
| P4.2 | TRP only            | 60002 | 1697 | 904L steel alloy | 4 <sup>th</sup> weeks |
| P4.3 | TRP only            | 66936 | 1333 | 904L steel alloy | 4 <sup>th</sup> weeks |
| L1.1 | light only          | 72562 | 1481 | 904L steel alloy | 1 <sup>st</sup> week  |
| L1.2 | light only          | 69581 | 1139 | 904L steel alloy | 1 <sup>st</sup> week  |
| L1.3 | light only          | 62898 | 1073 | 904L steel alloy | 1 <sup>st</sup> week  |
| L2.1 | light only          | 69359 | 1148 | 904L steel alloy | 2 <sup>se</sup> weeks |
| L2.2 | light only          | 71503 | 980  | 904L steel alloy | 2 <sup>se</sup> weeks |
| L2.3 | light only          | 69620 | 927  | 904L steel alloy | 2 <sup>se</sup> weeks |
| L4.1 | light only          | 79542 | 620  | 904L steel alloy | 4 <sup>th</sup> weeks |
| L4.2 | light only          | 76719 | 910  | 904L steel alloy | 4 <sup>th</sup> weeks |
| L4.4 | light only          | 62336 | 1108 | 904L steel alloy | 4 <sup>th</sup> weeks |
| N1.1 | No TRP and no light | 68541 | 1380 | 904L steel alloy | 1 <sup>st</sup> week  |
| N1.2 | No TRP and no light | 74771 | 1376 | 904L steel alloy | 1 <sup>st</sup> week  |
| N1.3 | No TRP and no light | 59722 | 1385 | 904L steel alloy | 1 <sup>st</sup> week  |
| N2.1 | No TRP and no light | 68910 | 1242 | 904L steel alloy | 2 <sup>se</sup> weeks |
| N2.2 | No TRP and no light | 64573 | 1207 | 904L steel alloy | 2 <sup>se</sup> weeks |
| N2.3 | No TRP and no light | 58654 | 1196 | 904L steel alloy | 2 <sup>se</sup> weeks |
| N4.1 | No TRP and no light | 64277 | 729  | 904L steel alloy | 4 <sup>th</sup> weeks |
| N4.2 | No TRP and no light | 64421 | 1240 | 904L steel alloy | 4 <sup>th</sup> weeks |
| N4.3 | No TRP and no light | 54545 | 1602 | 904L steel alloy | 4 <sup>th</sup> weeks |

---

**Table S2.** The sequence profile of the metagenomic paired-end reads (read length 150 bp) sequenced using Illumina HiSeq 2500 platform.

| Metagenome | Raw reads  | Clean reads | N50 of contigs | Total length of<br>contigs (bp) | Total number<br>of contigs | GC%   |
|------------|------------|-------------|----------------|---------------------------------|----------------------------|-------|
| PL1W       | 79,366,220 | 69,062,308  | 1,434          | 285,459,196                     | 228,040                    | 51.66 |
| PL2W       | 70,330,702 | 60,575,726  | 1,823          | 329,780,398                     | 232,630                    | 52.04 |
| P1W        | 75,864,406 | 65,255,954  | 1,337          | 538,207,523                     | 449,267                    | 53.57 |
| P2W        | 89,146,598 | 75,768,092  | 1,267          | 567,051,497                     | 490,790                    | 53.66 |
| L1W        | 78,586,648 | 68,115,450  | 1,115          | 485,838,727                     | 457,325                    | 50.58 |
| L2W        | 90,441,092 | 76,518,124  | 1,195          | 329,659,655                     | 295,644                    | 50.28 |
| N1W        | 73,411,976 | 62,754,276  | 1,180          | 531,208,478                     | 478,763                    | 52.58 |
| N2W        | 76,364,314 | 63,644,202  | 1,185          | 503,301,901                     | 456,516                    | 46.75 |



**Table S3.** Environmental physicochemical parameters of seawater at each sampling time.

| Sampling<br>Time | Temperature<br>(°C) | Salinity<br>(‰) | pH   | Chlorophyll<br>(µg/l) | TOC<br>(mg/L) | NH <sub>4</sub> <sup>+</sup> -N<br>(mg/L) | NO <sub>2</sub> <sup>-</sup> -N<br>(mg/L) | NO <sub>3</sub> <sup>-</sup> -N<br>(mg/L) | PO <sub>4</sub> <sup>3-</sup> -P<br>(mg/L) |
|------------------|---------------------|-----------------|------|-----------------------|---------------|-------------------------------------------|-------------------------------------------|-------------------------------------------|--------------------------------------------|
| 0 week           | 28.55               | 32.66           | 8.65 | 0.18                  | 2.03          | 0.189                                     | 0.007                                     | 0.035                                     | 0.027                                      |
| 1 Week           | 28.19               | 33.66           | 8.60 | 0.15                  | 2.08          | 0.155                                     | 0.002                                     | 0.018                                     | 0.020                                      |
| 2 Week           | 27.63               | 33.78           | 8.70 | 0.20                  | 1.93          | 0.216                                     | 0.010                                     | 0.060                                     | 0.029                                      |
| 4 Week           | 29.09               | 31.91           | 8.74 | 0.17                  | 1.84          | 0.142                                     | 0.005                                     | 0.054                                     | 0.035                                      |

**Table S4.** Indicator taxa in each group (node degree $\geq 5$ , betweenness centrality value  $\leq 1000$  and relative abundances  $>2.0\%$  of the total number of bacterial communities).

| Group | Indicator taxa                                                                                                                      |
|-------|-------------------------------------------------------------------------------------------------------------------------------------|
| SW    | <i>Marivivens</i> , <i>Synechococcus_CC9902</i> , <i>Marinobacterium</i>                                                            |
| PL    | <i>Alteromonas</i> , <i>Parvularcula</i> , <i>Teredinibacter</i> , <i>Labrenzia</i> ,<br><i>Aestuariibacter</i> , <i>Maricaulis</i> |
| P     | <i>Alteromonas</i> , <i>Aestuariibacter</i> , <i>Teredinibacter</i> ,<br><i>Donghicola</i> , <i>Methylophaga</i>                    |
| L     | <i>Alteromonas</i> , <i>Rhodovulum</i> , <i>Parvularcula</i> , <i>Teredinibacter</i> ,<br><i>Candidatus_Actinomarina</i>            |
| N     | <i>Donghicola</i> , <i>Methylophaga</i> , <i>Aestuariibacter</i>                                                                    |

**Table S5.** Permutational multivariate analysis of variance (W is the week).

| Group                 | R <sup>2</sup> | Pr(>F) |
|-----------------------|----------------|--------|
| SW/PL/P/L/N(1W/2W/4W) | 0.732          | 0.001  |
| SW(1W/2W/4W)          | 0.239          | 0.524  |
| PL(1W/2W/4W)          | 0.642          | 0.004  |
| P(1W/2W/4W)           | 0.402          | 0.016  |
| L(1W/2W/4W)           | 0.636          | 0.003  |
| N(1W/2W/4W)           | 0.57           | 0.005  |
| PL/P/L/N(1W)          | 0.686          | 0.001  |
| PL/P/L/N(2W)          | 0.611          | 0.001  |
| PL/P/L/N(4W)          | 0.583          | 0.003  |
